# Supplementary material for: Hierarchical TiO2 nanoflowers/nanosheets array film: synthesis, growth mechanism and enhanced photoelectrochemical properties
Source: Royal Society of Chemistry journal article supplement (doi:10.1039/c4ra12245c), 2014-12-11
Supplement: c4ra12245c1.pdf [file c4ra12245c1.pdf]

## **Hierarchical TiO<sub>2</sub> Nanoflowers/Nanosheets Array Film: Synthesis, Growth Mechanism and Enhanced Photoelectrochemical Properties**

**Huizhen Yao,<sup>a</sup> Jinwen Ma,<sup>b</sup> Yannan Mu,<sup>a,c</sup> Yanli Chen,<sup>a</sup> Shi Su,<sup>a</sup> Pin Lv,<sup>a</sup> Xiaolin Zhang,<sup>a</sup> Dong Ding,<sup>a</sup> Wuyou Fu,<sup>a</sup> Haibin Yang<sup>\*a</sup>**

*a State Key Laboratory of Superhard Materials Jilin University, Changchun 130012, PR China. Fax: +86-431-85168763; Tel: +86-431-85168763; E-mail: yanghb@jlu.edu.cn*

*b College of New Energy, Bohai University, Jinzhou, Liaoning, 121013, PR China. E-mail: mjw423@163.com*

*c Department of Physics and Chemistry, Heihe University, Heihe 164300, PR China. E-mail: myn17@yeah.net*

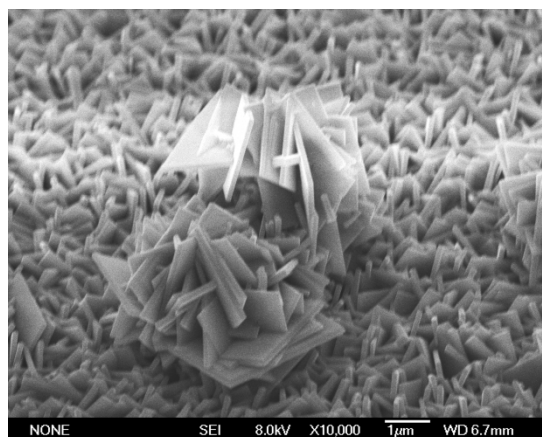

Figure.S1. FESEM images of TiO<sub>2</sub> nanostructures film as-prepared without the annealed treatment.

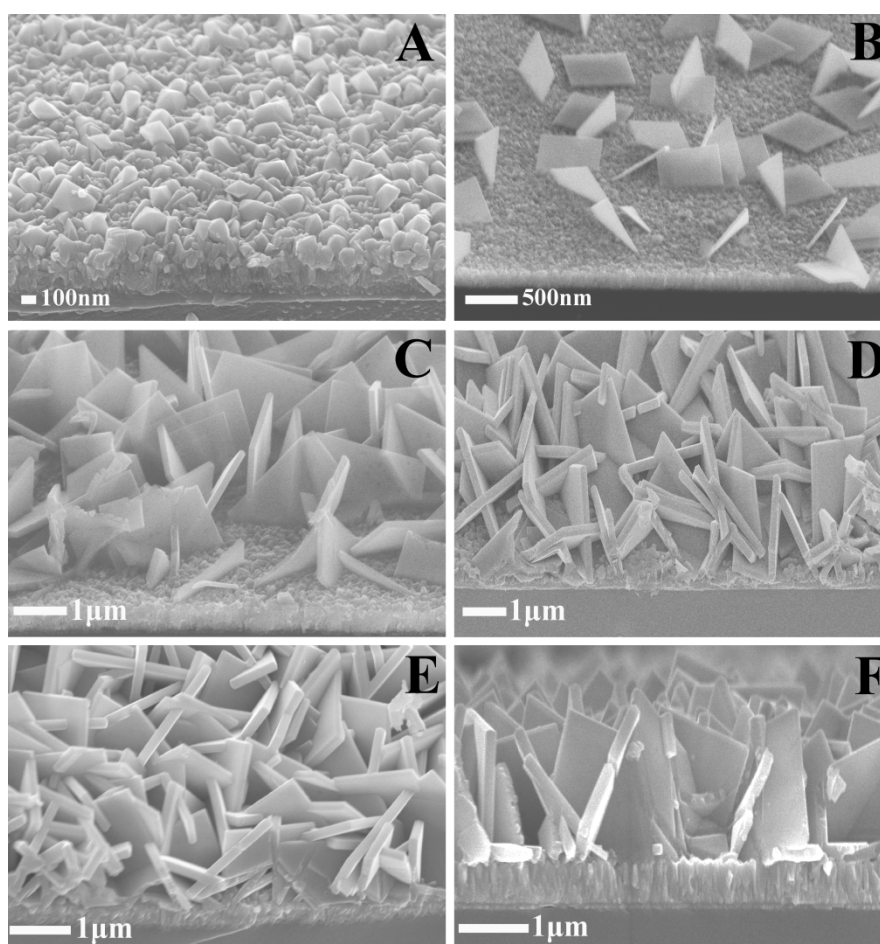

Figure.S2. Cross-sectional FESEM images of TiO<sub>2</sub> nanostructures film prepared at 170°C with 0.04M (NH<sub>4</sub>)<sub>2</sub>TiF<sub>6</sub> and 1 mL titanium butoxide for (A) 2 h; (B) 4 h; (C) 6 h; (D) 8 h; (E) 10 h; (F) 12 h.

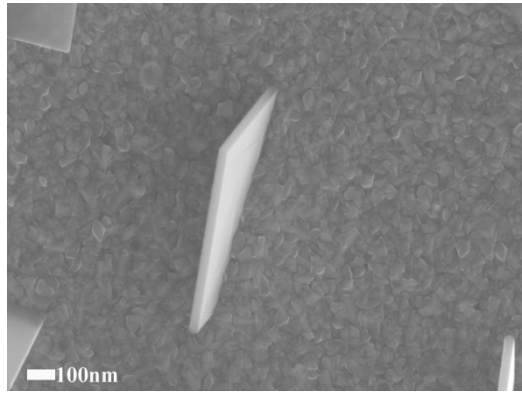

Figure.S3. High-magnification FESEM images of TiO<sub>2</sub> nanostructures film prepared at 170°C with 0.04M (NH<sub>4</sub>)<sub>2</sub>TiF<sub>6</sub> and 1 mL titanium butoxide for 4 h.

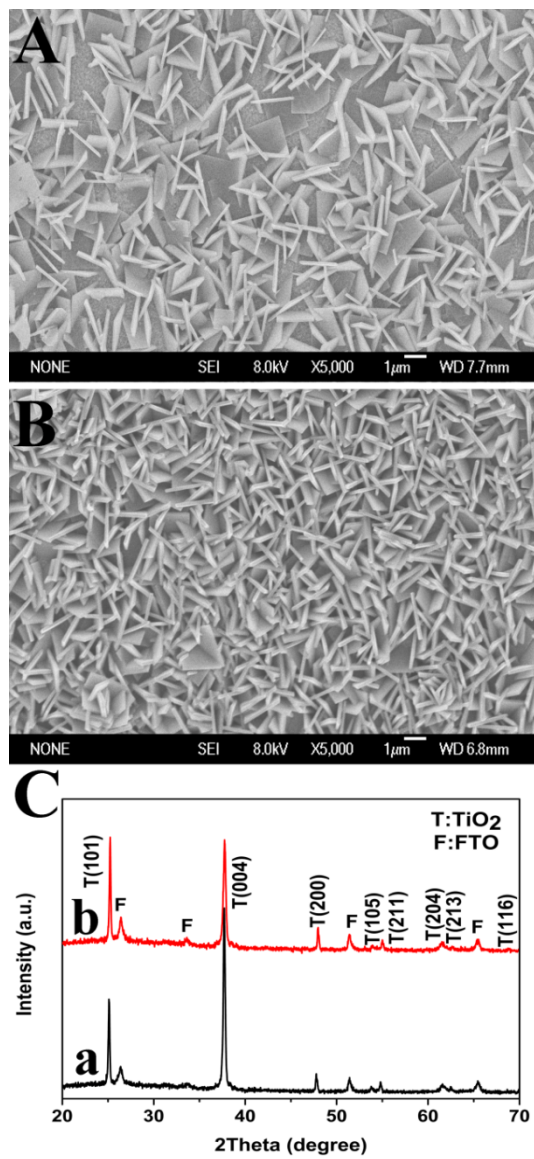

Figure.S4. FESEM images of TiO<sub>2</sub> nanostructures film prepared for 14 h with 0.04 M (NH<sub>4</sub>)<sub>2</sub>TiF<sub>6</sub> and 1 mL titanium butoxide at (A) 150°C, (B) 160°C; (C): the corresponding XRD patterns of TiO<sub>2</sub> nanostructures film prepared at (a) 150°C, (b) 160°C.
